# Supplementary material for: Potential Environmental Risk Characteristics of PCB Transformation Products in the Environmental Medium
Source: MDPI journal article supplement (doi:10.3390/toxics9090213), 2021-09-07
Supplement: s1 [file s1]

## Article

# Supplementary Materials: Potential Environmental Risk Characteristics of PCB Transformation Products in the Environmental Medium

Minghao Li <sup>1,2,†</sup>, Wei He <sup>1,†</sup>, Hao Yang <sup>1</sup>, Shimei Sun <sup>2,\*</sup> and Yu Li <sup>1,\*</sup>
<sup>1</sup> The Moe Key Laboratory of Resources and Environmental Systems Optimization, North China Electric Power University, Beijing 102206, China; lmh66@ncepu.edu.cn (M.L.); 120202232011@ncepu.edu.cn (W.H.); 120212232080@ncepu.edu.cn (H.Y.)

<sup>2</sup> School of Emergency Science and Engineering, Jilin Jianzhu University, Changchun 130119, China

\* Correspondence: sunshimei@jlju.edu.cn (S.S.); 50201549@ncepu.edu.cn (Y.L.)

† These authors have contributed equally to the study and they receive equal credit.

**Table S1.** Estimated statistics of the environmental risk characteristics of PCBs and their transformation products.

| Degradation Pathway           | Category             | Molecular   | Phytotoxicity | Change Rate (%) | Estrogen Toxicity | Change Rate (%) | Bioconcentration | Change Rate (%) | Persistence | Change Rate (%) | Migration | Change Rate (%) |
|-------------------------------|----------------------|-------------|---------------|-----------------|-------------------|-----------------|------------------|-----------------|-------------|-----------------|-----------|-----------------|
| Phytodegradation              | Molecule             | PCB-3       | 83.95         |                 | 67.89             |                 | 2.83             |                 | 0.18        |                 | 7.01      |                 |
|                               | Degradation products | 4 - CBA     | 66.11         | -21.26          | 60.42             | -11.01          | 4.57             | 61.26           | 0.91        | 421.71          | 9.27      | 32.27           |
|                               | Molecule             | PCB-4       | 73.80         |                 | 63.98             |                 | 3.42             |                 | 0.46        |                 | 7.41      |                 |
|                               | Degradation products | 2-CBA       | 72.80         | -1.36           | 69.30             | 8.32            | 4.55             | 33.06           | 1.31        | 183.33          | 8.49      | 14.68           |
|                               | Molecule             | PCB-5       | 79.09         |                 | 71.67             |                 | 3.86             |                 | 0.37        |                 | 7.44      |                 |
|                               | Degradation products | 2,3-CBA     | 77.57         | -1.93           | 69.84             | -2.56           | 5.02             | 29.99           | 1.36        | 268.38          | 8.69      | 16.91           |
|                               | Molecule             | PCB-11      | 83.12         |                 | 73.81             |                 | 3.69             |                 | 0.47        |                 | 8.19      |                 |
|                               | Degradation products | 3 - CBA     | 64.07         | -22.92          | 69.97             | -5.20           | 4.69             | 27.28           | 0.73        | 56.87           | 8.29      | 1.22            |
|                               | Molecule             | PCB-31      | 83.42         |                 | 70.01             |                 | 4.16             |                 | 0.70        |                 | 7.98      |                 |
|                               | Degradation products | 2,5-CBA     | 75.28         | -9.76           | 70.33             | 0.46            | 5.08             | 22.08           | 1.49        | 113.34          | 9.44      | 18.34           |
| Microbial aerobic degradation | Molecule             | PCB-97      | 76.13         |                 | 61.49             |                 | 5.19             |                 | 1.09        |                 | 9.40      |                 |
|                               | Degradation products | 4'-OH-CB97  | 71.34         | -6.30           | 55.05             | -10.48          | 5.35             | 3.10            | 1.13        | 3.85            | 8.90      | -5.35           |
|                               | Molecule             | PCB-101     | 72.90         |                 | 61.50             |                 | 5.26             |                 | 1.14        |                 | 9.31      |                 |
|                               | Degradation products | 4'-OH-CB101 | 62.36         | -14.46          | 59.60             | -3.08           | 5.70             | 8.21            | 1.11        | -2.46           | 10.24     | 10.05           |
|                               | Molecule             | PCB-107     | 84.56         |                 | 70.57             |                 | 5.21             |                 | 1.07        |                 | 10.16     |                 |
|                               | Degradation products | 4-OH-CB107  | 84.60         | 0.05            | 67.39             | -4.50           | 5.37             | 3.05            | 1.09        | 2.06            | 10.34     | 1.72            |
|                               | Molecule             | PCB-109     | 67.58         |                 | 57.75             |                 | 5.32             |                 | 1.01        |                 | 9.65      |                 |
|                               | Degradation products | 4-OH-CB109  | 67.77         | 0.28            | 59.92             | 3.76            | 5.83             | 9.50            | 0.95        | -6.23           | 8.01      | -17.01          |
|                               | Molecule             | PCB-118     | 88.52         |                 | 65.01             |                 | 5.17             |                 | 0.96        |                 | 10.07     |                 |
|                               | Degradation products | 3-OH-CB118  | 83.53         | -5.64           | 63.70             | -2.01           | 5.32             | 2.80            | 0.84        | -13.10          | 10.11     | 0.42            |
|                               | Molecule             | PCB-148     | 70.80         |                 | 52.26             |                 | 5.33             |                 | 1.31        |                 | 9.61      |                 |
|                               | Degradation products | 4-OH-CB148  | 66.70         | -5.79           | 55.92             | 6.99            | 5.47             | 2.53            | 1.39        | 6.09            | 11.39     | 18.51           |
|                               | Molecule             | PCB-153     | 66.59         |                 | 57.17             |                 | 5.55             |                 | 1.24        |                 | 10.03     |                 |

|                                 |                      |             |       |       |       |       |      |        |      |        |       |        |
|---------------------------------|----------------------|-------------|-------|-------|-------|-------|------|--------|------|--------|-------|--------|
| Microbial anaerobic degradation | Degradation products | 3-OH-CB153  | 78.53 | 17.93 | 59.69 | 4.40  | 5.87 | 5.67   | 1.39 | 12.31  | 9.61  | -4.16  |
|                                 | Molecule             | PCB-162     | 86.26 |       | 69.84 |       | 5.65 |        | 1.38 |        | 10.65 |        |
|                                 | Degradation products | 4-OH-CB162  | 85.20 | -1.23 | 64.24 | -8.02 | 6.00 | 6.20   | 1.51 | 9.67   | 11.46 | 7.55   |
|                                 | Molecule             | PCB-172     | 69.30 |       | 61.41 |       | 6.05 |        | 1.58 |        | 11.06 |        |
|                                 | Degradation products | 4'-OH-CB172 | 66.42 | -4.16 | 55.88 | -9.01 | 5.84 | -3.54  | 1.69 | 7.04   | 12.04 | 8.86   |
|                                 | Molecule             | PCB-187     | 71.07 |       | 52.76 |       | 5.70 |        | 1.56 |        | 12.00 |        |
|                                 | Degradation products | 4-OH-CB187  | 72.69 | 2.28  | 52.85 | 0.18  | 5.92 | 3.72   | 1.60 | 2.11   | 10.80 | -10.01 |
|                                 | Molecule             | PCB-199     | 73.26 |       | 53.73 |       | 5.93 |        | 1.74 |        | 11.10 |        |
|                                 | Degradation products | 4'-OH-CB199 | 85.35 | 16.50 | 62.00 | 15.40 | 5.61 | -5.40  | 1.08 | -37.71 | 8.92  | -19.68 |
|                                 | Molecule             | PCB-202     | 68.26 |       | 49.88 |       | 5.81 |        | 1.81 |        | 10.30 |        |
|                                 | Degradation products | 4-OH-CB202  | 69.99 | 2.53  | 56.65 | 13.56 | 5.45 | -6.13  | 2.08 | 14.67  | 10.24 | -0.66  |
|                                 | Molecule             | PCB-90      | 73.42 |       | 60.34 |       | 5.12 |        | 1.14 |        | 9.63  |        |
|                                 | Degradation products | PCB-49      | 71.32 | -2.86 | 61.96 | 2.68  | 4.58 | -10.56 | 0.97 | -14.96 | 8.57  | -11.03 |
|                                 | Degradation products | PCB-68      | 90.33 | 23.02 | 68.13 | 12.91 | 4.73 | -7.55  | 0.86 | -24.30 | 8.74  | -9.24  |
|                                 | Molecule             | PCB-91      | 62.97 |       | 53.69 |       | 5.05 |        | 1.05 |        | 9.33  |        |
|                                 | Degradation products | PCB-51      | 63.43 | 0.74  | 52.78 | -1.70 | 4.55 | -9.93  | 0.90 | -14.24 | 8.44  | -9.58  |
|                                 | Molecule             | PCB-92      | 64.06 |       | 65.18 |       | 5.25 |        | 1.16 |        | 9.31  |        |
|                                 | Degradation products | PCB-52      | 67.20 | 4.91  | 64.52 | -1.01 | 4.71 | -10.30 | 0.99 | -14.74 | 8.54  | -8.28  |
|                                 | Degradation products | PCB-72      | 84.90 | 32.53 | 72.84 | 11.75 | 4.73 | -9.99  | 0.99 | -14.91 | 8.64  | -7.23  |
|                                 | Molecule             | PCB-95      | 65.13 |       | 58.46 |       | 5.13 |        | 1.05 |        | 8.99  |        |
|                                 | Degradation products | PCB-53      | 68.36 | 4.96  | 66.01 | 12.92 | 4.56 | -11.08 | 0.92 | -11.75 | 8.24  | -8.32  |
|                                 | Molecule             | PCB-99      | 65.06 |       | 56.70 |       | 5.13 |        | 1.12 |        | 9.63  |        |
|                                 | Degradation products | PCB-47      | 65.82 | 1.16  | 57.20 | 0.88  | 4.63 | -9.64  | 0.83 | -25.45 | 8.89  | -7.66  |
|                                 | Molecule             | PCB-101     | 72.90 |       | 61.50 |       | 5.26 |        | 1.14 |        | 9.31  |        |
|                                 | Degradation products | PCB-49      | 71.32 | -2.17 | 61.96 | 0.75  | 4.58 | -13.09 | 0.97 | -15.19 | 8.57  | -7.90  |
|                                 | Molecule             | PCB-102     | 68.29 |       | 53.28 |       | 5.12 |        | 1.11 |        | 10.43 |        |
|                                 | Degradation products | PCB-51      | 63.43 | -7.11 | 52.78 | -0.93 | 4.55 | -11.09 | 0.90 | -19.04 | 8.44  | -19.10 |
|                                 | Molecule             | PCB-130     | 74.55 |       | 62.57 |       | 5.48 |        | 1.29 |        | 10.33 |        |
|                                 | Degradation products | PCB-90      | 73.42 | -1.51 | 60.34 | -3.57 | 5.12 | -6.58  | 1.14 | -12.01 | 9.63  | -6.77  |
|                                 | Molecule             | PCB-132     | 66.79 |       | 54.86 |       | 5.32 |        | 1.31 |        | 11.04 |        |
|                                 | Degradation products | PCB-91      | 62.97 | -5.72 | 53.69 | -2.13 | 5.05 | -4.96  | 1.05 | -19.97 | 9.33  | -15.48 |
|                                 | Molecule             | PCB-135     | 64.86 |       | 59.01 |       | 5.35 |        | 1.33 |        | 9.90  |        |
|                                 | Degradation products | PCB-94      | 71.34 | 9.98  | 55.61 | -5.76 | 5.08 | -5.03  | 1.09 | -17.74 | 8.94  | -9.69  |
|                                 | Molecule             | PCB-137     | 67.12 |       | 58.50 |       | 5.62 |        | 1.29 |        | 10.37 |        |
|                                 | Degradation products | PCB-90      | 73.42 | 9.40  | 60.34 | 3.15  | 5.12 | -8.95  | 1.14 | -11.66 | 9.63  | -7.13  |
|                                 | Degradation products | PCB-99      | 65.06 | -3.06 | 56.70 | -3.08 | 5.13 | -8.78  | 1.12 | -13.22 | 9.63  | -7.19  |
|                                 | Molecule             | PCB-138     | 68.89 |       | 57.87 |       | 5.48 |        | 1.24 |        | 10.07 |        |

|               |                      |                             |       |       |       |       |      |       |      |        |       |        |
|---------------|----------------------|-----------------------------|-------|-------|-------|-------|------|-------|------|--------|-------|--------|
|               | Degradation products | PCB-99                      | 65.06 | -5.56 | 56.70 | -2.02 | 5.13 | -6.43 | 1.12 | -10.22 | 9.63  | -4.42  |
|               | Molecule             | PCB-146                     | 75.03 |       | 60.76 |       | 5.55 |       | 1.38 |        | 10.03 |        |
|               | Degradation products | PCB-90                      | 73.42 | -2.15 | 60.34 | -0.70 | 5.12 | -7.84 | 1.14 | -17.50 | 9.63  | -3.99  |
|               | Molecule             | PCB-147                     | 65.47 |       | 52.28 |       | 5.27 |       | 1.28 |        | 9.95  |        |
|               | Degradation products | PCB-91                      | 62.97 | -3.82 | 53.69 | 2.69  | 5.05 | -4.08 | 1.05 | -18.41 | 9.33  | -6.15  |
|               | Molecule             | PCB-149                     | 68.51 |       | 54.16 |       | 5.34 |       | 1.33 |        | 9.71  |        |
|               | Degradation products | PCB-102                     | 68.29 | -0.33 | 53.28 | -1.62 | 5.12 | -4.05 | 1.11 | -16.75 | 10.43 | 7.47   |
|               | Molecule             | PCB-151                     | 67.63 |       | 57.03 |       | 5.49 |       | 1.25 |        | 9.65  |        |
|               | Degradation products | PCB-95                      | 65.13 | -3.70 | 58.46 | 2.50  | 5.13 | -6.65 | 1.05 | -16.17 | 8.99  | -6.83  |
|               | Molecule             | PCB-153                     | 66.59 |       | 57.17 |       | 5.55 |       | 1.24 |        | 10.03 |        |
|               | Degradation products | PCB-99                      | 65.06 | -2.29 | 56.70 | -0.83 | 5.13 | -7.67 | 1.12 | -9.64  | 9.63  | -3.99  |
|               | Molecule             | PCB-154                     | 67.69 |       | 50.53 |       | 5.36 |       | 1.23 |        | 9.59  |        |
|               | Degradation products | PCB-100                     | 62.78 | -7.27 | 50.01 | -1.03 | 5.02 | -6.36 | 1.01 | -18.00 | 8.91  | -7.09  |
|               | Molecule             | PCB-170                     | 73.37 |       | 58.64 |       | 5.96 |       | 1.55 |        | 11.47 |        |
|               | Degradation products | PCB-130                     | 74.55 | 1.61  | 62.57 | 6.70  | 5.48 | -8.17 | 1.29 | -16.76 | 10.33 | -9.91  |
|               | Degradation products | PCB-137                     | 67.12 | -8.52 | 58.50 | -0.24 | 5.62 | -5.77 | 1.29 | -17.09 | 10.37 | -9.56  |
|               | Degradation products | PCB-138                     | 68.89 | -6.10 | 57.87 | -1.33 | 5.48 | -8.13 | 1.24 | -19.86 | 10.07 | -12.19 |
|               | Molecule             | PCB-174                     | 70.36 |       | 55.18 |       | 5.57 |       | 1.54 |        | 10.60 |        |
|               | Degradation products | PCB-149                     | 68.51 | -2.63 | 54.16 | -1.85 | 5.34 | -4.24 | 1.33 | -13.80 | 9.71  | -8.38  |
|               | Molecule             | PCB-180                     | 68.69 |       | 57.95 |       | 6.04 |       | 1.53 |        | 10.77 |        |
|               | Degradation products | PCB-153                     | 66.59 | -3.06 | 57.17 | -1.34 | 5.55 | -8.10 | 1.24 | -19.12 | 10.03 | -6.92  |
|               | Degradation products | PCB-146                     | 75.03 | 9.24  | 60.76 | 4.85  | 5.55 | -8.11 | 1.38 | -9.82  | 10.03 | -6.87  |
|               | Molecule             | PCB-183                     | 71.55 |       | 50.91 |       | 5.75 |       | 1.55 |        | 10.35 |        |
|               | Degradation products | PCB-154                     | 67.69 | -5.38 | 50.53 | -0.73 | 5.36 | -6.71 | 1.23 | -20.72 | 9.59  | -7.36  |
|               | Molecule             | PCB-187                     | 71.07 |       | 52.76 |       | 5.70 |       | 1.56 |        | 12.00 |        |
|               | Degradation products | PCB-149                     | 68.51 | -3.60 | 54.16 | 2.65  | 5.34 | -6.45 | 1.33 | -14.90 | 9.71  | -19.09 |
|               | Molecule             | PCB-49                      | 71.32 |       | 61.96 |       | 4.58 |       | 0.97 |        | 8.57  |        |
| Biometabolism | Degradation products | 3'-MeSO <sub>2</sub> -CB49  | 67.66 | -5.14 | 56.88 | -8.19 | 5.46 | 19.39 | 0.91 | -5.69  | 10.24 | 19.44  |
|               | Molecule             | PCB-64                      | 64.29 |       | 57.25 |       | 4.78 |       | 0.81 |        | 8.69  |        |
|               | Degradation products | 4'-MeSO <sub>2</sub> -CB64  | 62.72 | -2.44 | 52.25 | -8.74 | 5.27 | 10.23 | 1.15 | 42.10  | 9.61  | 10.50  |
|               | Molecule             | PCB-70                      | 86.77 |       | 69.27 |       | 4.77 |       | 0.96 |        | 9.13  |        |
|               | Degradation products | 3'-MeSO <sub>2</sub> -CB70  | 78.98 | -8.97 | 66.08 | -4.61 | 5.57 | 16.77 | 1.18 | 22.72  | 10.99 | 20.42  |
|               | Molecule             | PCB-110                     | 68.63 |       | 61.74 |       | 5.12 |       | 1.08 |        | 9.84  |        |
|               | Degradation products | 3'-MeSO <sub>2</sub> -CB110 | 67.57 | -1.56 | 62.03 | 0.48  | 4.98 | -2.75 | 1.17 | 8.45   | 9.56  | -2.92  |

|                  |                      |                            |       |       |        |       |      |        |      |        |       |        |
|------------------|----------------------|----------------------------|-------|-------|--------|-------|------|--------|------|--------|-------|--------|
| Photodegradation | Molecule             | PCB-149                    | 68.51 |       | 53.15  |       | 5.34 |        | 1.33 |        | 9.71  |        |
|                  | Degradation products | 4-MeSO <sub>2</sub> -CB149 | 81.80 | 19.40 | 54.16  | 1.89  | 5.34 | 0.13   | 1.63 | 22.09  | 10.56 | 8.82   |
|                  | Molecule             | PCB-174                    | 70.36 |       | 56.80  |       | 5.57 |        | 1.54 |        | 10.60 |        |
|                  | Degradation products | 4-MeSO <sub>2</sub> -CB174 | 72.89 | 3.60  | 55.18  | -2.86 | 5.32 | -4.45  | 1.72 | 11.66  | 11.12 | 4.95   |
|                  | Molecule             | PCB-47                     | 65.82 |       | 57.20  |       | 4.63 |        | 0.83 |        | 8.89  |        |
|                  | Degradation products | PCB-15                     | 89.55 | 36.06 | 65.04  | 13.72 | 3.59 | -22.50 | 0.33 | -60.70 | 7.87  | -11.43 |
|                  | Molecule             | PCB-40                     | 73.33 |       | 65.30  |       | 4.56 |        | 0.90 |        | 9.17  |        |
|                  | Degradation products | PCB-11                     | 83.12 | 13.35 | 73.81  | 13.03 | 3.69 | -19.16 | 0.47 | -48.11 | 8.19  | -10.68 |
|                  | Molecule             | PCB-101                    | 72.90 |       | 61.50  |       | 5.26 |        | 1.14 |        | 9.31  |        |
|                  | Degradation products | PCB-70                     | 86.77 | 19.01 | 69.27  | 12.63 | 4.64 | -11.85 | 0.96 | -15.36 | 9.13  | -1.89  |
|                  | Molecule             | PCB-171                    | 70.28 |       | 49.26  |       | 5.73 |        | 1.53 |        | 10.72 |        |
|                  | Degradation products | PCB-35                     | 86.14 | 22.56 | 69.104 | 0.28  | 4.41 | -22.93 | 0.62 | -59.57 | 8.99  | -16.20 |
